# Supplementary material for: High-efficiency photoreduction of CO2 in a low vacuum
Source: Royal Society of Chemistry journal article supplement (doi:10.1039/d2cp00269h), 2022-01-01
Supplement: d2cp00269h1.pdf [file d2cp00269h1.pdf]

## Supplementary Information

# High-efficiency photoreduction of CO<sub>2</sub> in low vacuum

Yuxin Liu,<sup>a,e</sup> Shuai Kang,<sup>\*a,b</sup> Tinghua Li,<sup>c</sup> Zhuofeng Hu,<sup>\*d</sup> Yiwei Ren,<sup>a,b</sup> Ziwei Pan,<sup>b</sup> Xie Fu,<sup>a,b</sup> Liang Wang,<sup>a,b</sup> Shuanglong Feng,<sup>a,b</sup> Jinling Luo,<sup>b</sup> Lei Feng<sup>a,b</sup> and Wenqiang Lu<sup>\*a,b</sup>

<sup>a</sup> Chongqing Institute of Green and Intelligent Technology, Chinese Academy of Sciences, Chongqing 400714, China

<sup>b</sup> Chongqing School, University of Chinese Academy of Sciences, Chongqing 400714, China

<sup>c</sup> Technical Center of China Tobacco Yunnan Industrial Co., Ltd, Kunming 650231, China

<sup>d</sup> School of Environmental Science and Engineering, Guangdong Provincial Key Laboratory of Environmental Pollution Control and Remediation Technology, Sun Yat-sen University, Guangzhou 510275, China

<sup>e</sup> University of Chinese Academy of Sciences, Beijing 100049, China

\*Corresponding author: Shuai Kang (kangshuai@cigit.ac.cn); Zhuofeng Hu (huzhf8@mail.sysu.edu.cn); Wenqiang Lu (wqlu@cigit.ac.cn)

## Table of Contents

|                                                                                                                               |    |
|-------------------------------------------------------------------------------------------------------------------------------|----|
| Figure S1. Photocatalytic CO <sub>2</sub> reduction system with online gas analysis.....                                      | 3  |
| Figure S2. Absolute gas pressure vs. CO <sub>2</sub> content and the approximate H <sub>2</sub> O content.....                | 4  |
| Figure S3. Schematic of the reactor.....                                                                                      | 5  |
| Figure S4. Experimental procedure in this work.....                                                                           | 6  |
| Figure S5. Temperature of the titanium oxide covered glass slide during irradiation .....                                     | 7  |
| Figure S6. CH <sub>4</sub> yield at 390 K with and without irradiation .....                                                  | 8  |
| Figure S7. Physical characterizations of the commercial $\alpha$ -TiO <sub>2</sub> .....                                      | 9  |
| Figure S8. Gas chromatography curves of CH <sub>4</sub> in different CO <sub>2</sub> ratios.....                              | 10 |
| Figure S9. Calibration curves of the gas chromatography of CH <sub>4</sub> at different pressures .....                       | 11 |
| Figure S10. Gas chromatography curves of CH <sub>4</sub> with and without catalysts. ....                                     | 12 |
| Figure S11. CH <sub>4</sub> yield in different vacuum degrees.....                                                            | 13 |
| Table S1. CH <sub>4</sub> selectivity at various vacuum degrees.....                                                          | 14 |
| Table S2. CO production rate at different gas pressure and CO <sub>2</sub> content. ....                                      | 14 |
| Figure S12. Binding energy evolution of the TiO <sub>2</sub> photocatalyst upon long-term stability test.....                 | 15 |
| Figure S13. High-resolution XPS spectra of O 1s and C 1s on TiO <sub>2</sub> before stability test. ....                      | 16 |
| Figure S14. High-resolution XPS spectra of O 1s after running 3.5h and 24 h.....                                              | 17 |
| Table S3. Peak fitting parameters of C 1s.. ....                                                                              | 18 |
| Figure S15. Mechanism of CO <sub>2</sub> photoreduction. ....                                                                 | 19 |
| Figure S16. CH <sub>4</sub> /CO accumulation and yield of the Pt-TiO <sub>2</sub> catalyst at –80 kPa and 0 kPa. ....         | 20 |
| Figure S17. CH <sub>4</sub> accumulation and yield on Pt–TiO <sub>2</sub> catalysts at –80 kPa in pure CO <sub>2</sub> . .... | 21 |
| References .....                                                                                                              | 22 |

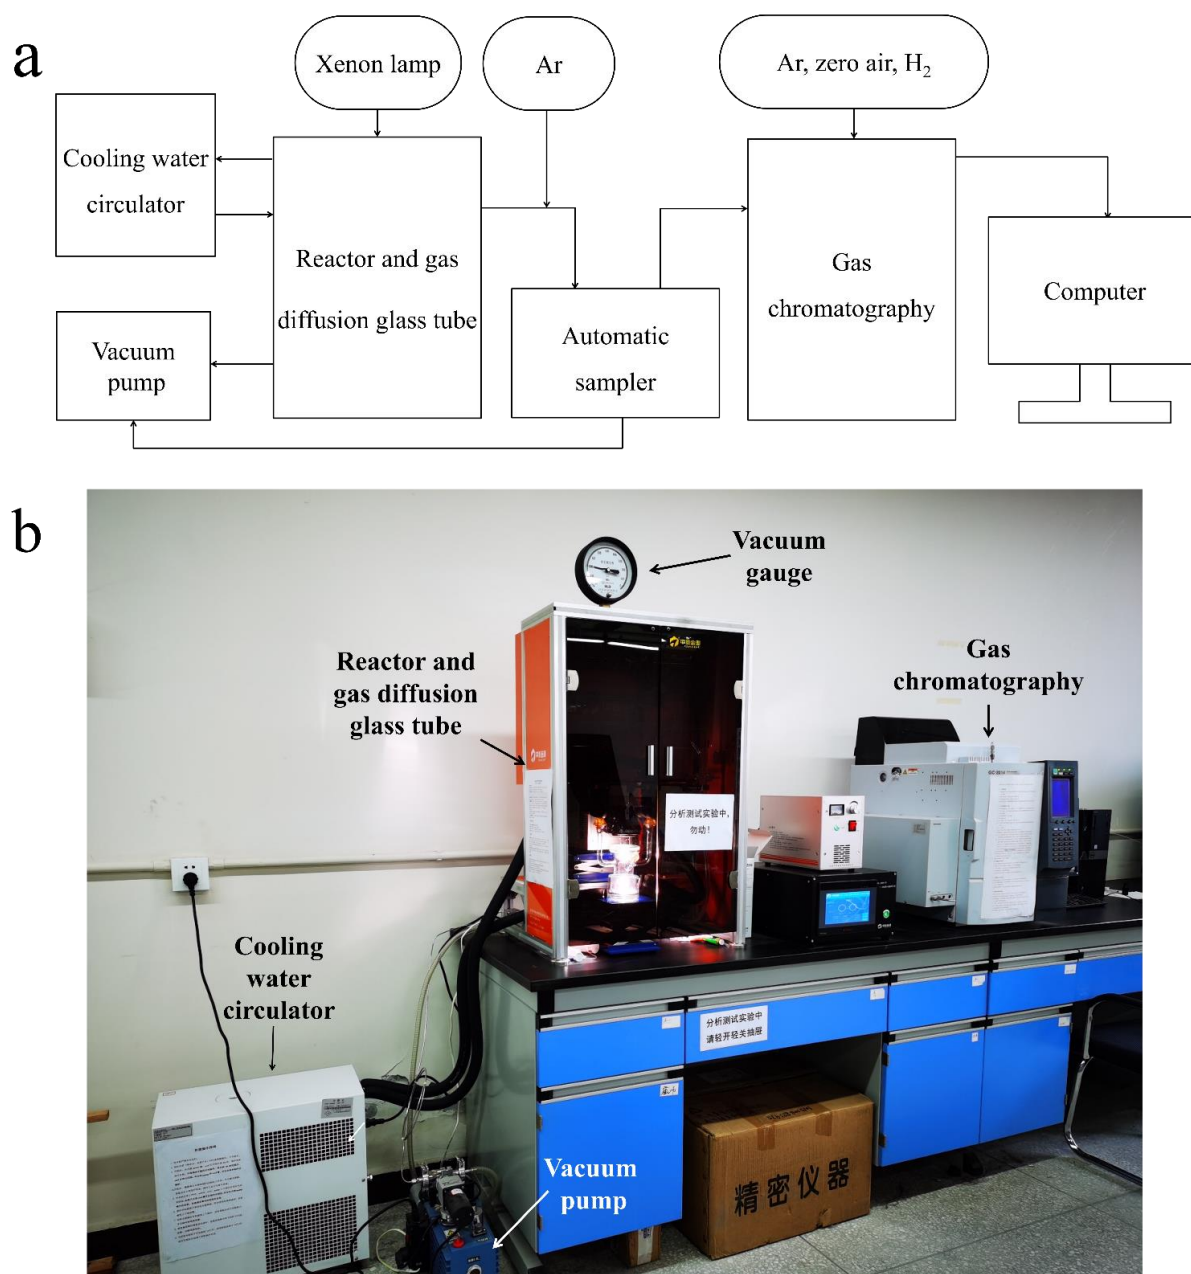

**Figure S1.** Photocatalytic CO<sub>2</sub> reduction system with online gas analysis. (a) Schematic and (b) photograph.

The total gas pressure:

$$P_{total} = P_{CO_2} + P_{H_2O}$$

According to the Ideal Gas Law:

$$P = \frac{nRT}{V}$$

Where P is the absolute pressure, V is the volume, T is the absolute temperature (T). n is the number of moles, R is the universal gas constant, 8.3145 J/mol K.

In this system, R, T and V is constant.

If we set,

$$a = \frac{RT}{V}$$

Then,

$$P = a \times n$$

Thus,

$$P_{total} = P_{CO_2} + P_{H_2O} = a \times n_{CO_2} + a \times n_{H_2O}$$

$$n_{CO_2} = \frac{1}{a} \times P_{total} - n_{H_2O}$$

From the linear correlation between the absolute gas pressure and CO<sub>2</sub> content in Figure S2, the H<sub>2</sub>O content in the system is constant and approximately 0.16 mmol.

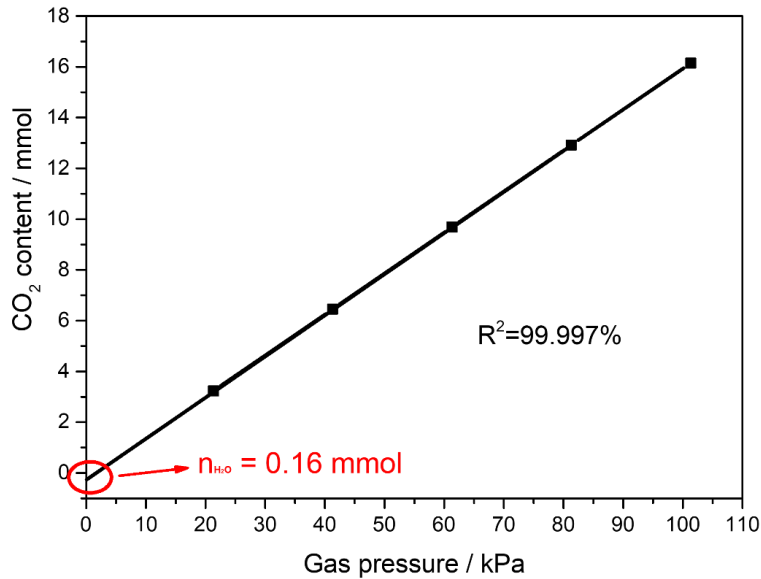

**Figure S2.** Absolute gas pressure vs. CO<sub>2</sub> content and the approximate H<sub>2</sub>O content.

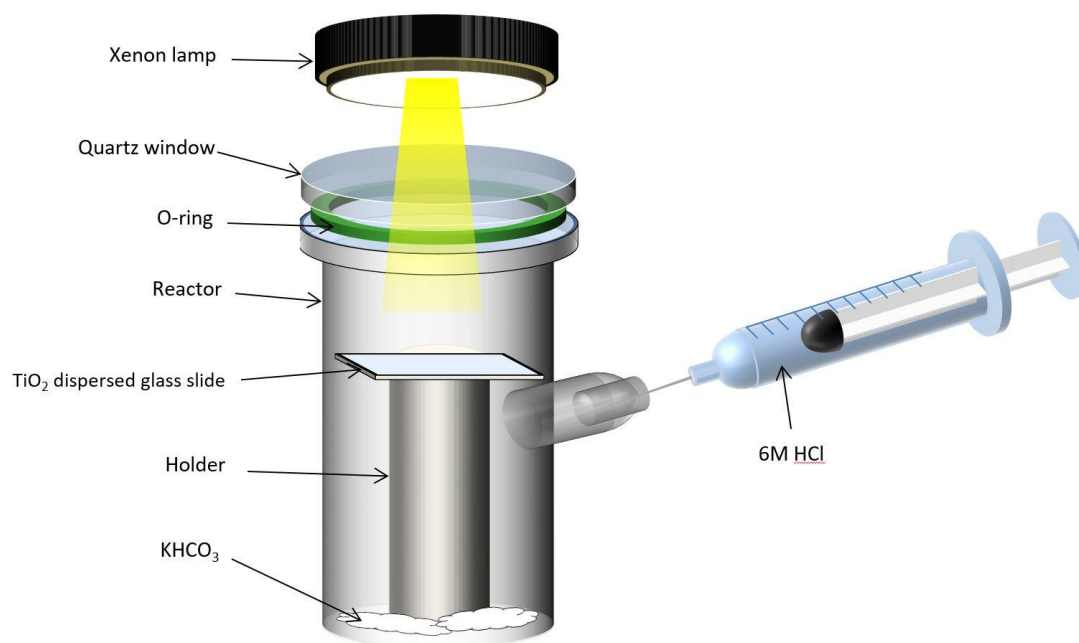

**Figure S3.** Schematic of the reactor.

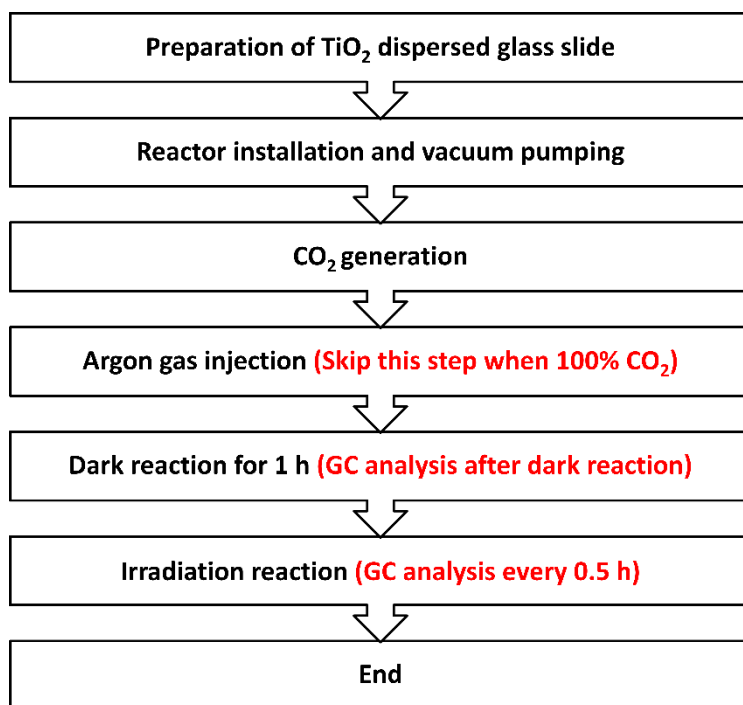

**Figure S4.** Experimental procedure in this work.

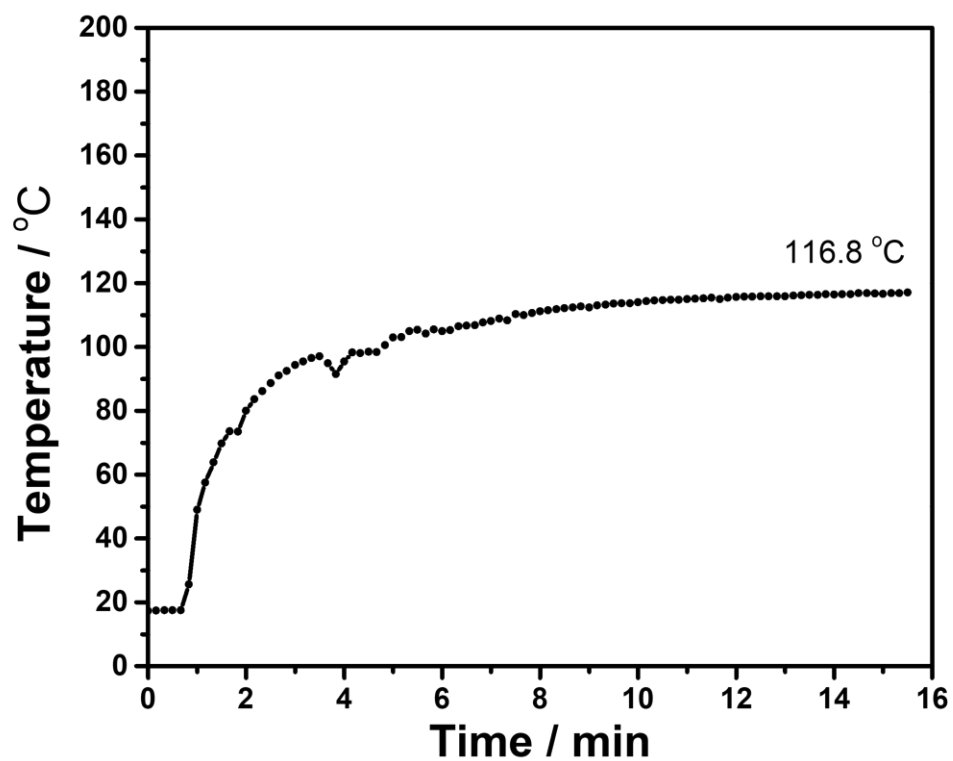

**Figure S5.** Temperature of the titanium oxide covered glass slide during irradiation.

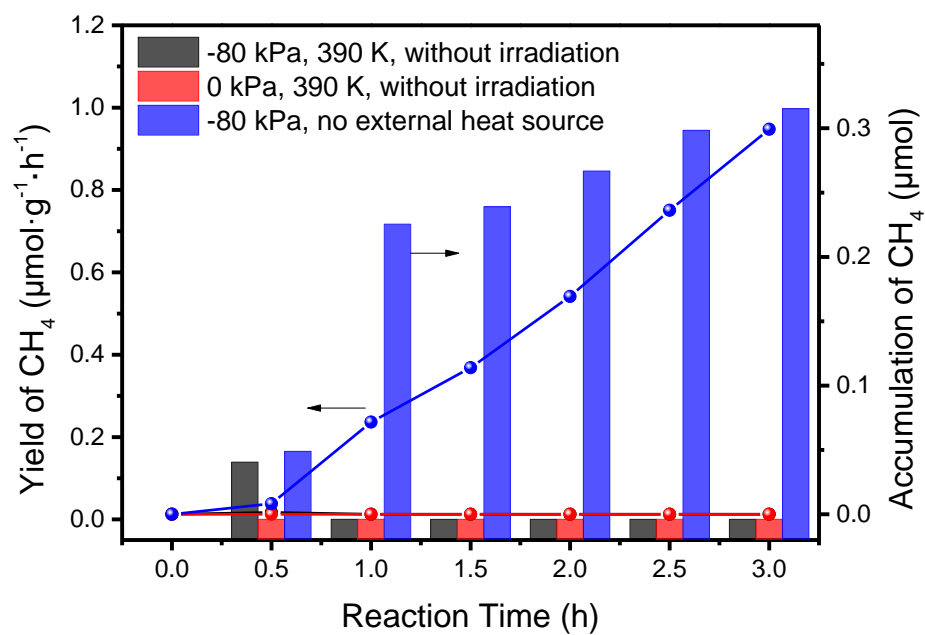

Figure S6. CH<sub>4</sub> yield at 390 K with and without irradiation.



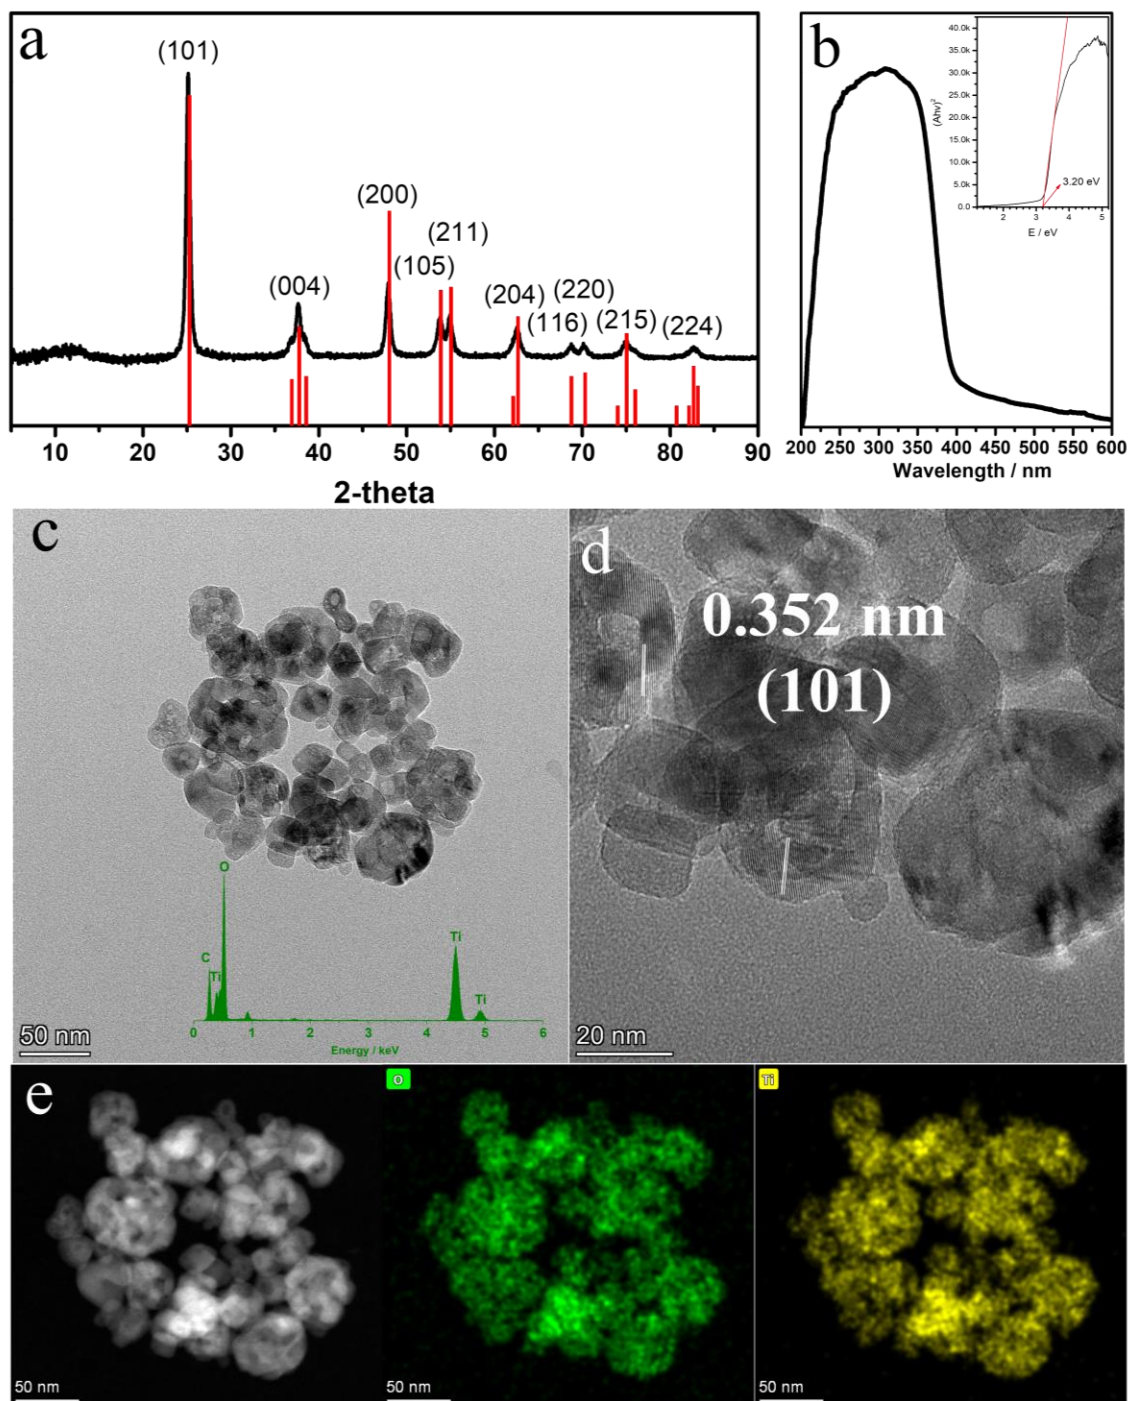

**Figure S7.** Physical characterizations of the commercial  $\alpha$ -TiO<sub>2</sub>. (a) XRD pattern of the commercial  $\alpha$ -TiO<sub>2</sub>. (101) is the most stable lattice plane. (b) Absorption spectrum of the commercial  $\alpha$ -TiO<sub>2</sub> covered glass slide. Inset is the Mott-Schottky curve. (c-d) TEM images. Inset is the EDS spectrum. (e) HAADF image and the corresponding elemental mappings of O and Ti.

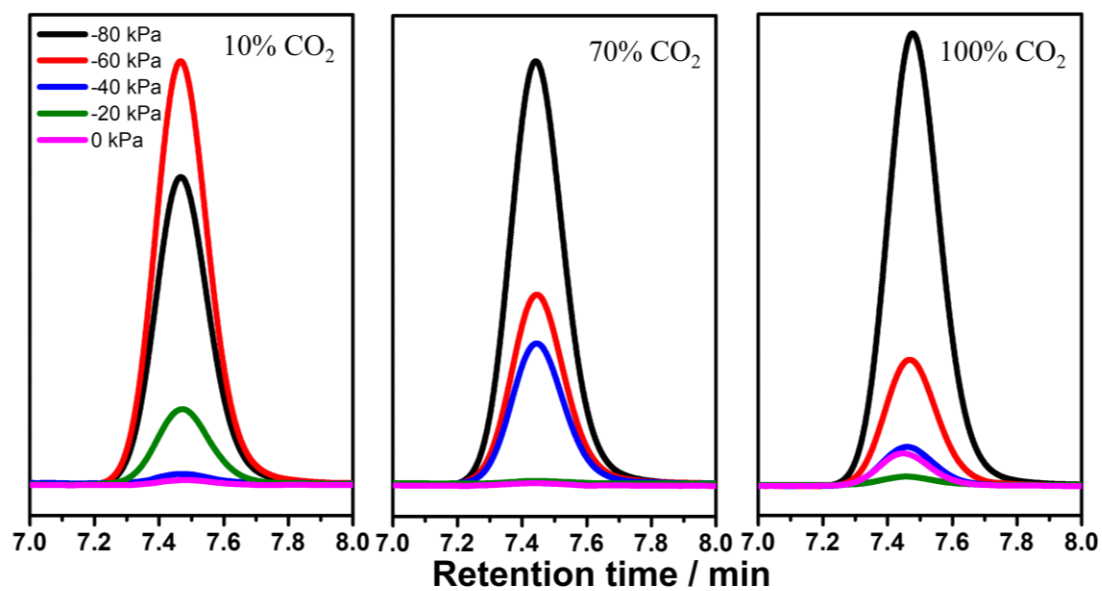

**Figure S8.** Gas chromatography curves of CH<sub>4</sub> in different CO<sub>2</sub> ratios.

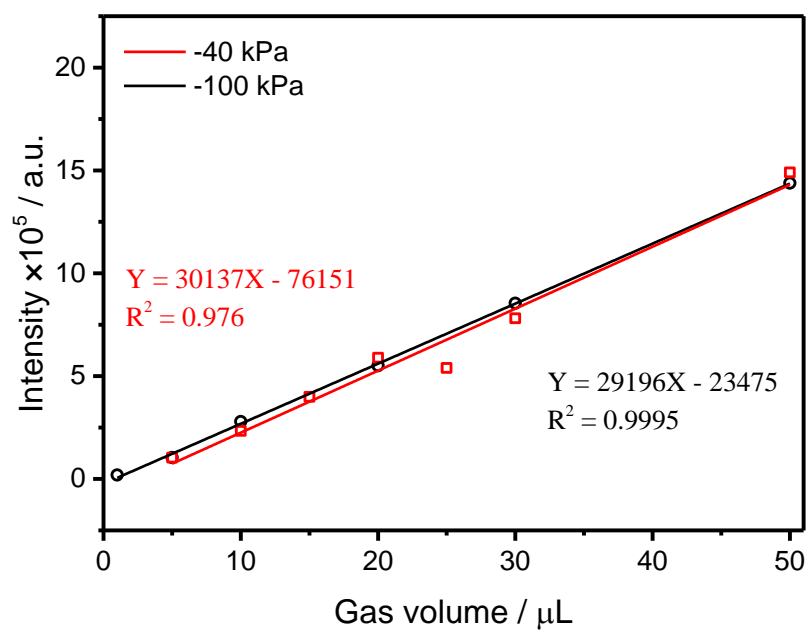

Figure S9. Calibration curves of the gas chromatography of CH<sub>4</sub> at different pressures.

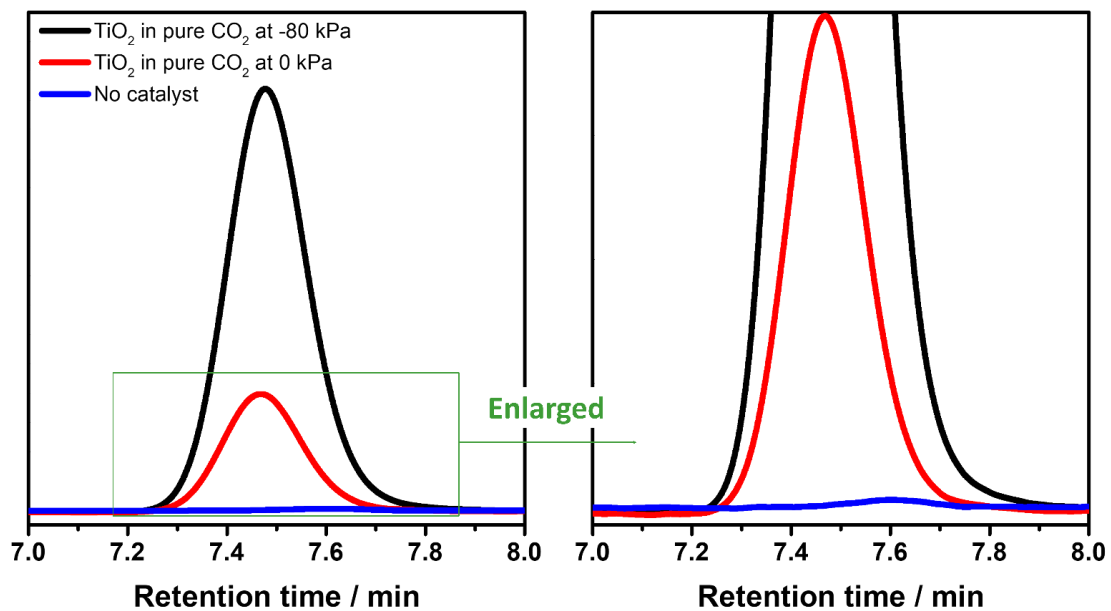

**Figure S10.** Gas chromatography curves of  $\text{CH}_4$  with and without catalysts.

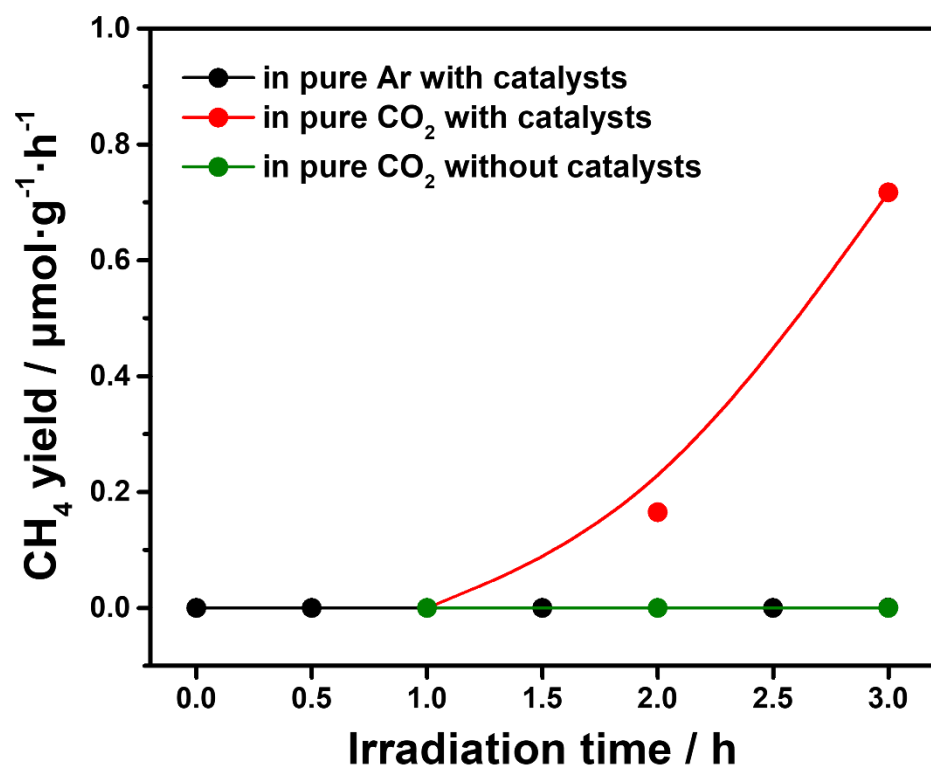

**Figure S11.**  $\text{CH}_4$  yield in different vacuum degrees.

**Table S1.** CH<sub>4</sub> selectivity at various vacuum degrees.

| <b>Unit (%)</b> | <b>10% CO<sub>2</sub></b> | <b>70% CO<sub>2</sub></b> | <b>100% CO<sub>2</sub></b> |
|-----------------|---------------------------|---------------------------|----------------------------|
| <b>-80 kPa</b>  | 68.52                     | 85                        | 85.89                      |
| <b>-60 kPa</b>  | 64.89                     | 73.5                      | 89.368                     |
| <b>-40 kPa</b>  | 23.894                    | 60.14                     | 95.734                     |
| <b>-20 kPa</b>  | 37.93                     | 95.19                     | 53.987                     |
| <b>-0 kPa</b>   | 46.85                     | --                        | 95.903                     |

The selectivity of CH<sub>4</sub> in the following discussion is calculated according to the following equation.

$$\text{Selectivity}_{CH_4} = \frac{n_{CH_4}}{n_{CH_4} + n_{CO}}$$

where n is the mole number.

**Table S2.** CO production rate at different gas pressure and CO<sub>2</sub> content.

| <b>Unit (nmol g<sup>-1</sup> h<sup>-1</sup>)</b> | <b>10% CO<sub>2</sub></b> | <b>70% CO<sub>2</sub></b> | <b>100% CO<sub>2</sub></b> |
|--------------------------------------------------|---------------------------|---------------------------|----------------------------|
| <b>-80 kPa</b>                                   | 180.5                     | 90.63                     | 103.35                     |
| <b>-60 kPa</b>                                   | 244.97                    | 139.33                    | 33.74                      |
| <b>-40 kPa</b>                                   | 51.12                     | 254.33                    | 15.03                      |
| <b>-20 kPa</b>                                   | 335.83                    | 6.23                      | 29.84                      |
| <b>0</b>                                         | 5.23                      | 6.01                      | 9.34                       |

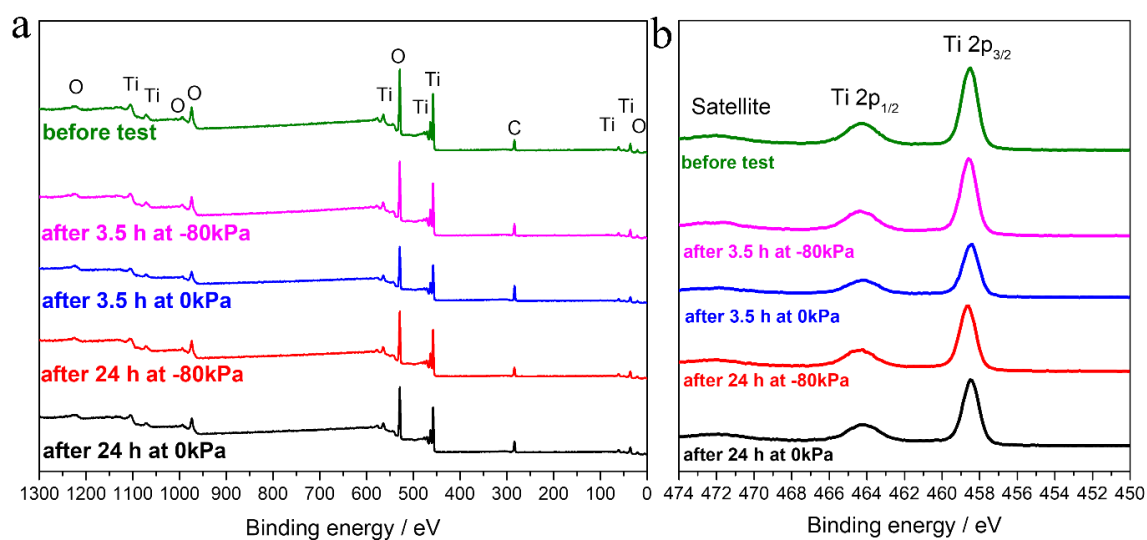

**Figure S12.** Binding energy evolution of the  $\text{TiO}_2$  photocatalyst upon long-term stability test. (a) XPS survey spectra and (b) high-resolution XPS spectra of Ti 2p.

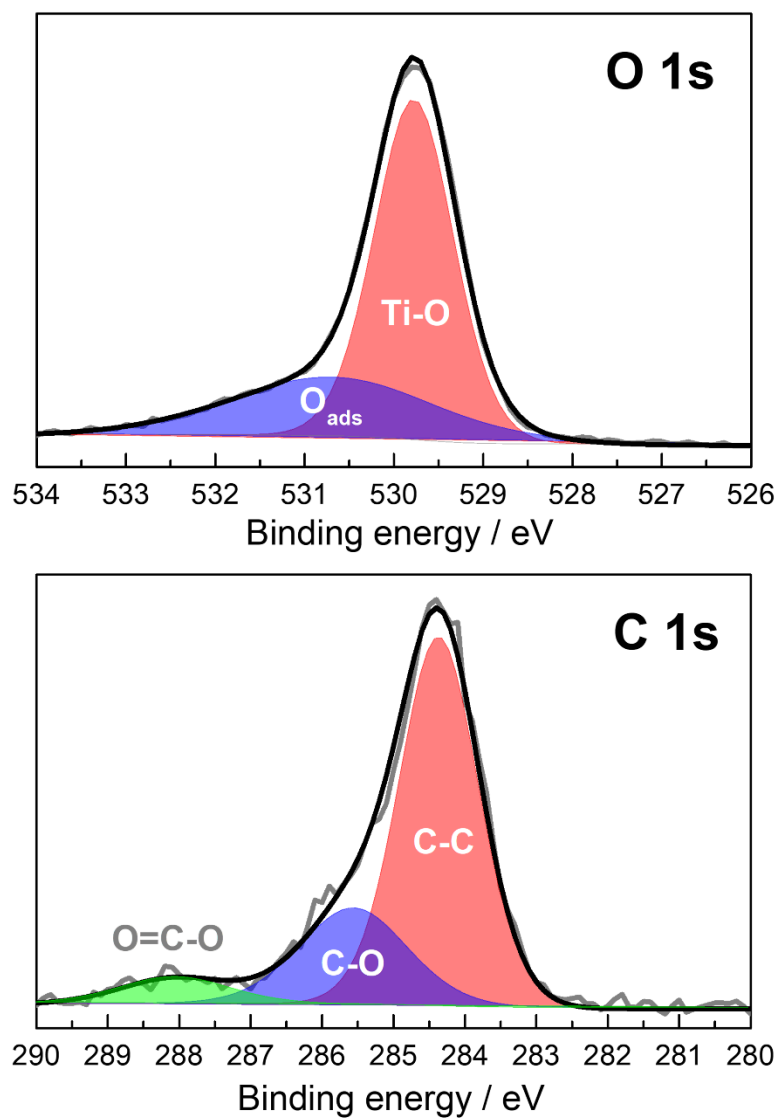

**Figure S13.** High resolution XPS spectra of O 1s and C 1s on commercial TiO<sub>2</sub> before stability test.



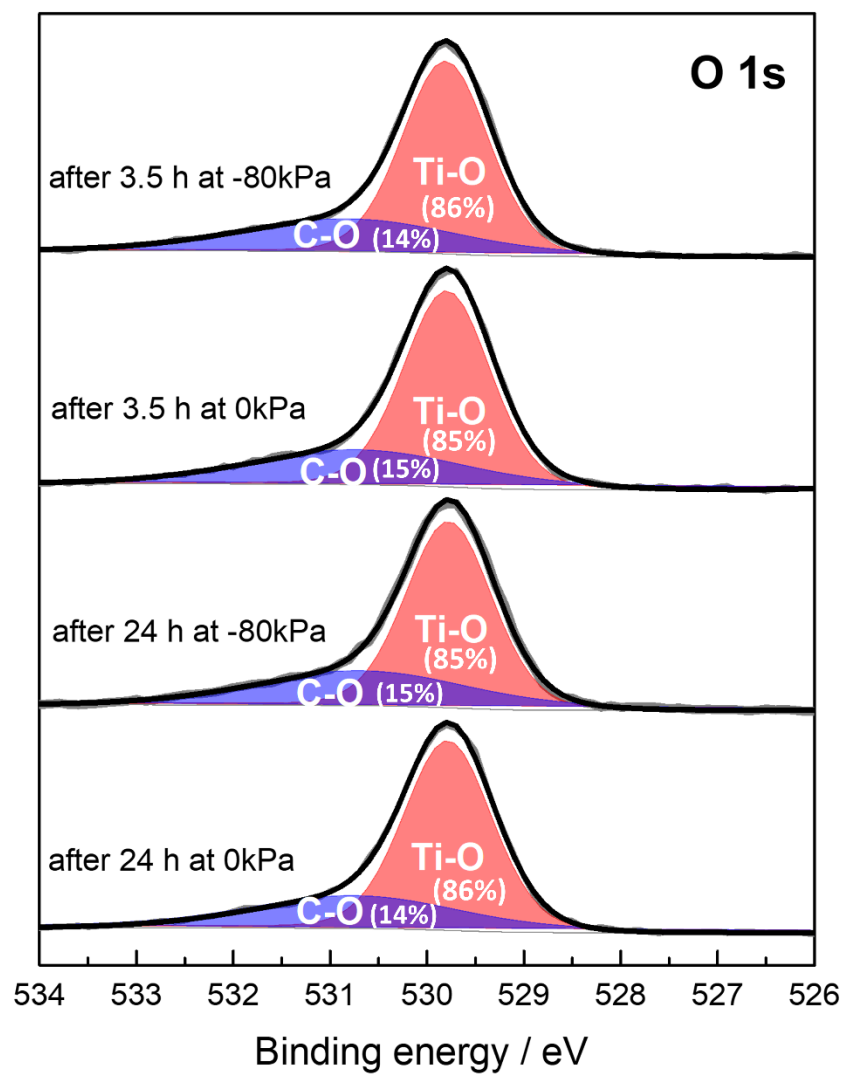

**Figure S14.** High-resolution XPS spectra of O 1s after running 3.5h and 24 h.

**Table S3.** Peak fitting parameters of C 1s.

|                | Name  | Peak BE | FWHM eV | Area (P)<br>CPS.eV | Atomic % |
|----------------|-------|---------|---------|--------------------|----------|
| Before test    | C-C   | 284.4   | 1.33    | 10197.72           | 74.94    |
|                | C-O   | 285     | 1.32    | 2732.26            | 20.08    |
|                | O=C-O | 288.1   | 1.81    | 678.06             | 4.98     |
| 3.5h at -80kPa | C-C   | 284.4   | 1.18    | 18375.97           | 80.83    |
|                | C-O   | 285     | 1.53    | 3968.54            | 17.46    |
|                | O=C-O | 288.1   | 3.37    | 389.35             | 1.71     |
| 3.5 h at 0kPa  | C-C   | 284.4   | 1.14    | 15922.5            | 85.19    |
|                | C-O   | 285     | 1.84    | 1372.62            | 7.34     |
|                | O=C-O | 288.1   | 1.17    | 339.88             | 1.82     |
| 24 h at -80kPa | C-C   | 284.4   | 1.32    | 8876.62            | 79.25    |
|                | C-O   | 285     | 1.45    | 1730.15            | 15.45    |
|                | O=C-O | 288.1   | 1.31    | 507.98             | 4.54     |
| 24 h at 0kPa   | C-C   | 284.4   | 1.2     | 10383.1            | 78.41    |
|                | C-O   | 285     | 1.35    | 1970.19            | 14.88    |
|                | O=C-O | 288.1   | 3.37    | 946.72             | 7.15     |

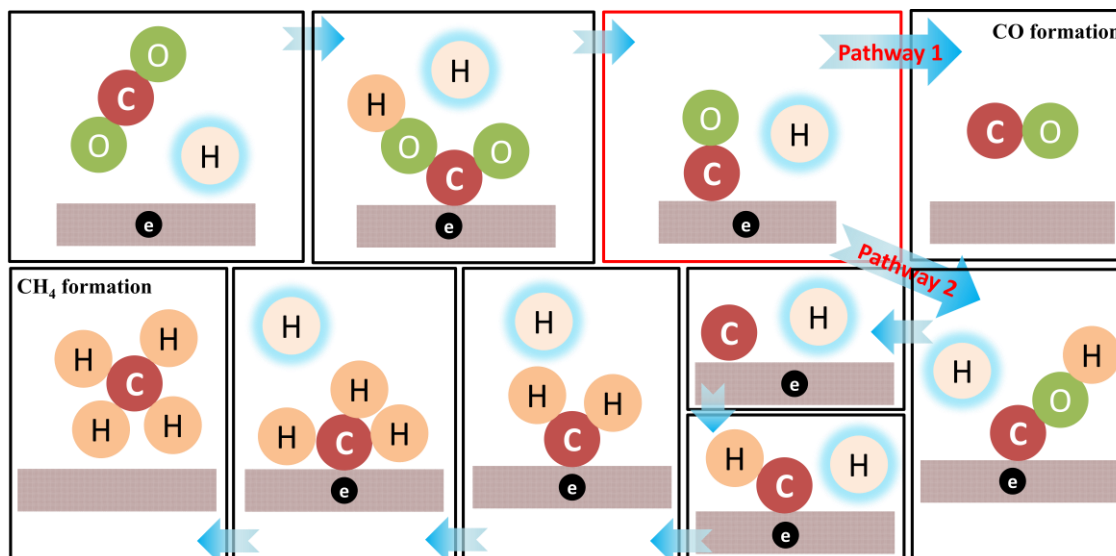

**Figure S15.** Mechanism of CO<sub>2</sub> photoreduction and the fundamental steps of CO<sub>2</sub> photoreduction in two pathways.

Generally, there are two pathways of CO<sub>2</sub> photoreduction. One is the formation of CO (following the equations S3–S5), the other is the formation of CH<sub>4</sub> (following the equations S3–S4, S6–S12).<sup>1, 2</sup>

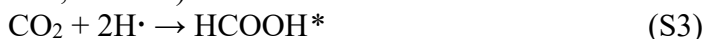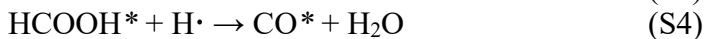

Pathway 1: CO formation

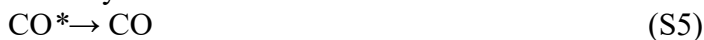

Pathway 2: CH<sub>4</sub> formation

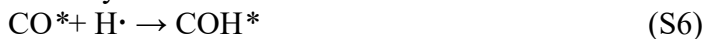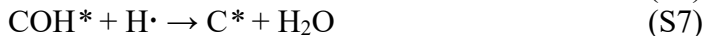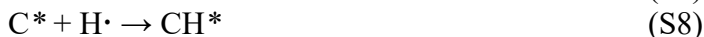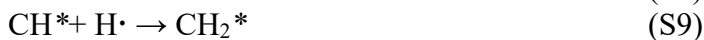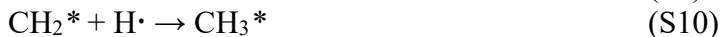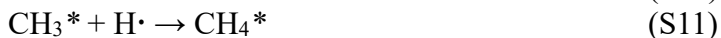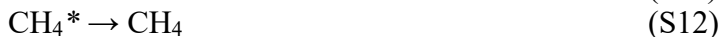

When CO\* on the surface of TiO<sub>2</sub> continued to obtain electrons and protons forming COH\*, CH<sub>4</sub> generated; otherwise, CO generated. The faster those electrons and H<sup>+</sup> were transferred, the higher CH<sub>4</sub> yield.

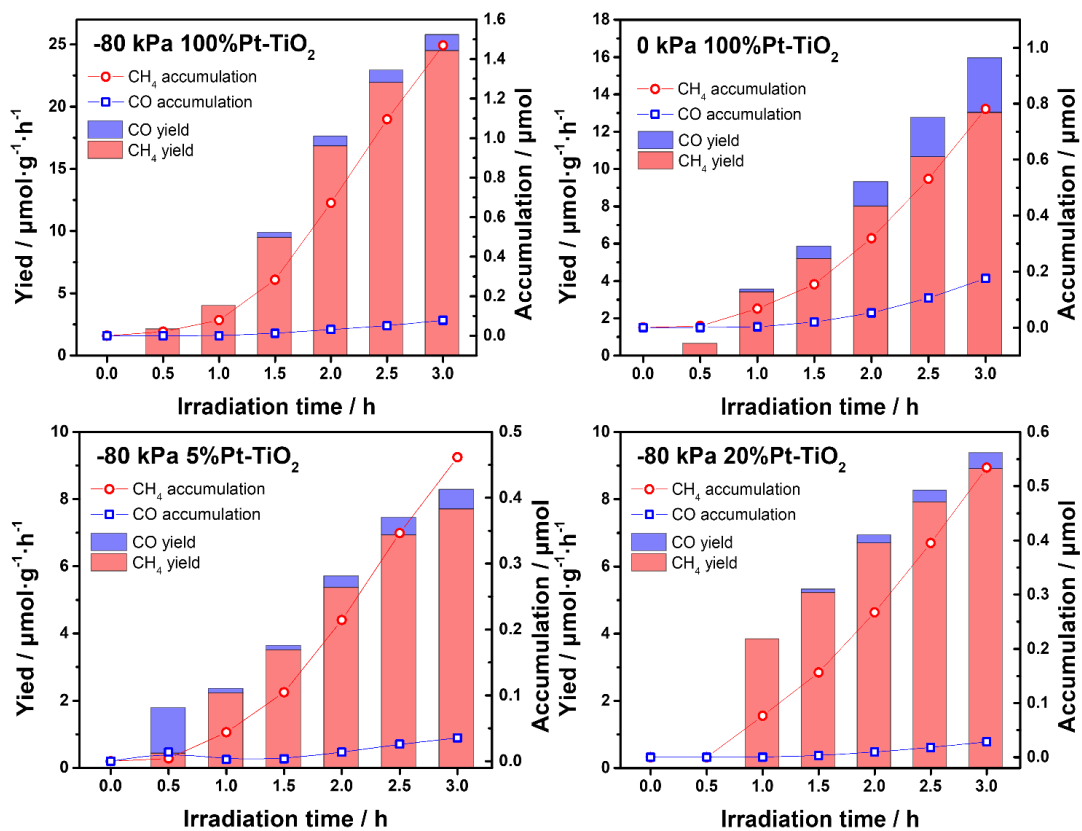

**Figure S16.** CH<sub>4</sub>/CO accumulation and yield of the Pt-TiO<sub>2</sub> catalyst at –80 kPa and 0 kPa.

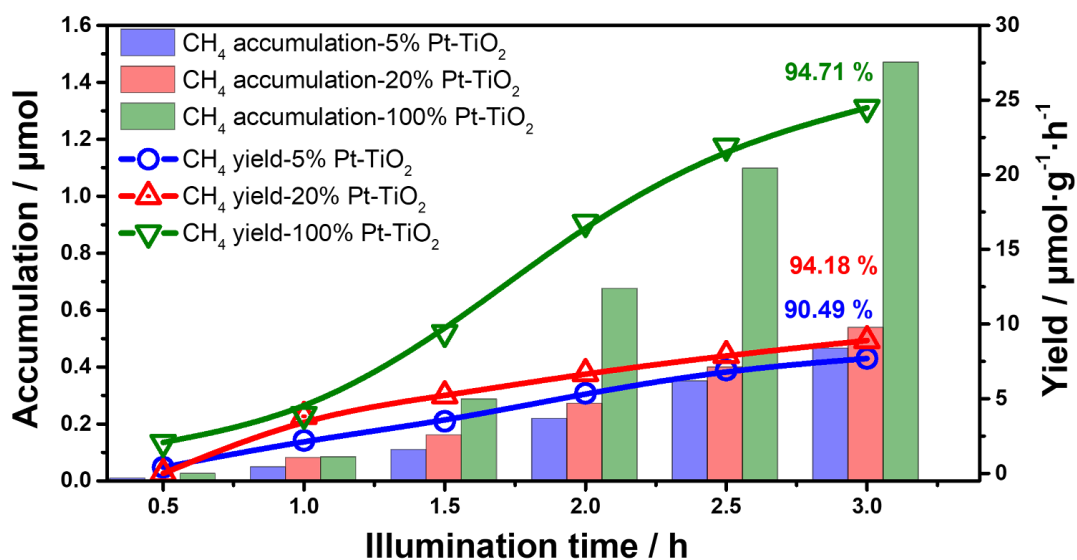

**Figure S17.** CH<sub>4</sub> accumulation and yield from photocatalytic CO<sub>2</sub> reduction on Pt–TiO<sub>2</sub> catalysts at –80 kPa in pure CO<sub>2</sub>. CH<sub>4</sub> selectivity were 94.71%, 94.18%, 90.49% with 100%, 20% and 5% Pt-TiO<sub>2</sub>, respectively. For all catalysts, the loading was 20 mg.

## References

1. Z. Geng, Y. Cao, W. Chen, X. Kong, Y. Liu, T. Yao and Y. Lin, *Appl. Catal., B*, 2019, **240**, 234-240.
2. J. Fu, K. Jiang, X. Qiu, J. Yu and M. Liu, *Mater. Today*, 2020, **32**, 222-243.
